# 1 Programmable pattern formation in cellular systems with local signaling

2 Tiago Ramalho<sup>#</sup>, Stephan Kremser<sup>#</sup>, Hao Wu, Ulrich Gerland\*

3 Physics of Complex Biosystems, Physics Department, Technical University of Munich, James-  
4 Franck-Str. 1, D-85748 Garching, Germany

5  
6 <sup>#</sup> These authors contributed equally.

7 \* Corresponding author: [gerland@tum.de](mailto:gerland@tum.de)

## 8 9 **ABSTRACT**

10 **Diverse complex systems, ranging from developing embryos to systems of locally**  
11 **communicating agents, display an apparent capability of “programmable” pattern formation:**  
12 **They reproducibly form a target pattern, but this target can be readily changed. A**  
13 **distinguishing feature of such systems, as compared to simpler physical pattern forming**  
14 **systems, is that their subunits are capable of information processing. Here, we explore**  
15 **schemes for programmable pattern formation within a theoretical framework, in which**  
16 **subunits process discrete local signals to update their internal state according to logical rules.**  
17 **We study systems with different update rules, different topologies, and different control**  
18 **schemes, to assess their ability to perform programmable pattern formation and their**  
19 **susceptibility to errors. Only a small subset of systems permits local organizer cells to dictate**  
20 **any target pattern. These systems follow a common principle, whereby a temporal pattern is**  
21 **transcribed into a spatial pattern, reminiscent of the clock-and-wavefront mechanism**  
22 **underlying vertebrate somitogenesis. An alternative scheme employing several different rules**  
23 **can only form a fraction of patterns but is robust with respect to the timing of organizer cell**  
24 **inputs. Our results establish a basis for the design of synthetic systems, and for more detailed**  
25 **models of programmable pattern formation closer to real systems.**

## 26 INTRODUCTION

27 Programmable pattern formation is impressively exemplified in developmental biology, where  
28 relatively minor changes in the *cis*-regulatory regions of genes can reprogram the developmental  
29 process to yield dramatic changes in the morphology of the adult organism<sup>1,2</sup>. In these systems, the  
30 individual cells have internal states, but do not know the global state of the system. They process  
31 local cues according to their genetic program to determine how and when to change their internal  
32 state. Local organizers can induce changes in the internal states of other cells<sup>3</sup>, but there is no global  
33 agent overseeing the pattern formation process. Similar behavior can also emerge on a higher level,  
34 when e.g. groups of robots<sup>4,5</sup> or humans<sup>6</sup> coordinate their motion by local communication. These  
35 examples motivate the conceptual question: Which general schemes allow the same agents to  
36 produce different complex patterns by following rules to coordinate their behavior with their  
37 neighbors?

38 While natural systems consist of subunits that are already very complex, it is interesting to  
39 ask for the simplest model systems capable of programmable pattern formation. Such models would  
40 provide a conceptual framework for programmable pattern formation, and could reveal design  
41 principles, e.g., for synthetic molecular systems. DNA-based molecular systems, in particular, are  
42 readily programmable via the sequence-dependent interaction between DNA strands, which has  
43 been exploited to design self-assembling dynamic DNA devices<sup>7</sup>, neural network-like molecular  
44 computation<sup>8</sup>, coupled regulatory circuits<sup>9</sup>, and schemes for constructing molecular-scale cellular  
45 automata<sup>10</sup>. Here, we use a minimal model to study the concept of programmable pattern formation  
46 using theoretical and computational tools. While the intention is not to model any particular system,  
47 DNA-based implementations of the model are an interesting perspective (see 'Discussion').

48 We consider a system consisting of spatial subunits with fixed locations on a regular grid.  
49 Pattern formation requires the subunits to have at least two distinguishable states. We perform most  
50 of our analysis with such minimal subunits, but also present a generalization to subunits with more

51 internal states. The essential model assumptions are that subunits communicate only with their  
52 immediate neighbors and that they update their internal states at discrete time steps. The dynamics  
53 of a subunit is then governed by update `rules' that depend on its state, as well as on the state of its  
54 neighbors. This framework of so-called `cellular automata' is sufficiently flexible to describe a  
55 broad range of pattern formation processes that do not depend on long-range signaling between  
56 cells<sup>11,12</sup>. Furthermore, cellular automata are not solely abstract computational models, but can  
57 faithfully describe the dynamics of real systems, also in developmental biology<sup>13</sup>. For our analysis,  
58 a useful feature of cellular automata is that the number of possible update rules is finite – each rule  
59 is a different scheme for local information processing – and there are no additional model  
60 parameters.

61 Using this modeling framework, we focus on a scenario in which pattern formation is  
62 controlled by `organizer cells', inspired by the Spemann-Mangold organizer in developmental  
63 biology<sup>3</sup>. The underlying biological concept is inductive signaling, whereby one cell can change the  
64 fate of another cell<sup>14</sup>. For instance, in *Caenorhabditis elegans* vulval patterning, the `anchor cell'  
65 controls the cell fate pattern of six vulval precursor cells, involving three different cell fates<sup>15</sup>.  
66 Within the conceptual models that we consider, organizer cells can emit time-dependent signals into  
67 their neighborhood, affecting the pattern formation process of the remaining `bulk cells'.  
68 Programmability of pattern formation then refers to the ability of the organizer cells to reproducibly  
69 steer the system towards different target patterns, using different signaling sequences. We define a  
70 given model to be completely programmable, if organizers can direct the system to all different  
71 target patterns from any initial pattern. We consider programmability of pattern formation to be a  
72 desirable property, since it is reminiscent of the ability of developmental systems to work with only  
73 a small number of signaling systems, which are highly homologous between morphologically very  
74 different animals<sup>14</sup>.

75 Our analysis shows how the dynamics of the bulk cells, as specified by their update rule,  
76 affects the programmability of pattern formation. For the minimal system with 2-state cells, only  
77 ten update rules enable complete programmability. However, the number of such “programmable  
78 rules” increases strongly with the number of internal states. Patterning errors, incurred by cells that  
79 do not always follow their update rule, can be strongly reduced by an error correction scheme. The  
80 robustness against the timing of organizer inputs can be increased at the expense of a reduction in  
81 the extent of programmability if organizer cells are also able to induce changes in the update rules  
82 of bulk cells.

83

## 84 **RESULTS**

### 85 **A minimal model for programmable pattern formation controlled by organizer cells**

86 To explore the programmability of global pattern formation from local sites, we combine concepts  
87 from control theory with a class of models for pattern formation. Multiple modeling frameworks for  
88 pattern formation processes are available, which treat time, space, and patterning state either as  
89 discrete or continuum quantities, and differ also with respect to the level of detail of the  
90 description<sup>12</sup>. Here, we choose the most coarse-grained level of description, known as cellular  
91 automata (CA) models. Within this framework, a system consists of localized subunits referred to as  
92 ‘cells’. The patterning state of cell  $i$  at time  $t$  is denoted by  $x_i^t$ , which can only take on a finite  
93 number  $k$  of different values,  $x_i^t \in \{0, \dots, k - 1\}$ . In the simplest case of elementary CA, there are  
94 only two different states,  $x_i^t = 0$  or  $1$  and the cells are arranged in one dimension (1D). The  
95 dynamics of a CA model is governed by local rules specifying how the state of a cell is updated  
96 depending on the state of the cell itself and the states of the surrounding cells, see Fig. 1. For  
97 elementary CA, only the immediate neighbors of a cell affect its update, via an update rule of the  
98 form  $x_i^{t+1} = f(x_{i-1}^t, x_i^t, x_{i+1}^t)$ . Depending on the update rule, patterning information emerging from  
99 a localized source can propagate through the system to affect the global patterning process.



100 A familiar example of global pattern formation from local rules is the performance of large  
101 groups of dancers, where the performers produce dynamic patterns by following complex rules for  
102 moving in coordination with their immediate neighbors. A global acoustic or optical signal can  
103 facilitate the pattern formation process by synchronizing the dynamics. In molecular systems,  
104 synchronization can arise from a collectively produced long-range signal, or from a local coupling  
105 between oscillators<sup>9</sup>. CA models also typically assume synchronous updates of all cells, and we will  
106 follow this convention here. Note that the updates do not need to occur at constant time intervals in  
107 real time. Furthermore, the synchronous update assumption is not strictly required, since our model  
108 could also be based on an asynchronous CA system with subunits capable of local synchronization  
109 via interactions with their neighbors<sup>16</sup>.

110 Our model systems consist of 'bulk cells' and 'organizer cells' (Fig. 1a). Bulk cells simply  
111 follow their update rules, taking input signals from their neighbor(s), regardless of whether these are  
112 other bulk cells or organizer cells. Organizer cells do not take inputs but exert control on the pattern  
113 formation process by changing their internal state according to a specified protocol, which depends  
114 on the target pattern. We do not specify the origin of this protocol - it could be the result from an  
115 internal developmental program or could be the result of external manipulation. Since both natural  
116 and engineered patterning systems come in a variety of topologies, and the topology may affect the  
117 pattern formation process and its control, we consider two different topologies, linear and circular  
118 (Fig. 1b). In a circular topology, a single organizer cell is embedded in a ring of  $L$  bulk cells, while  
119 a linear array of bulk cells can be controlled by an organizer cell at one or both ends, or at any  
120 position within the array. We collectively denote the time-dependent patterning state of all bulk  
121 cells as  $X^t$ , and the time-dependent state of the organizer cells as  $O^t$ . The global patterning  
122 dynamics then follows  $X^{t+1} = F(X^t, O^t)$  with a global update function  $F$ .

123 We consider a patterning system of this type to be completely programmable, if (i) the  
124 organizer cells can steer any initial pattern  $X^0$  towards any desired target pattern  $Y$  in a finite time

125 with a suitable time-dependent organizer input  $O^t$ , and (ii) the time needed to reach the target  
126 pattern scales at most polynomially with the system size  $L$ . For instance, if the time to reach the  
127 target pattern increases linearly with  $L$ , we say that the system is completely programmable in linear  
128 time. In contrast, if the system would randomly generate different patterns, the expected time to  
129 produce a specified target pattern would increase exponentially with  $L$ . If complete  
130 programmability is not obtainable, we also consider partial programmability, where only a subset of  
131 target patterns is reachable. In either case, the sequence of organizer inputs,  $O^t$ , may depend on the  
132 initial pattern  $X^0$ . We first focus on the question of whether target patterns can be reached and will  
133 then consider the issue of stabilizing target patterns.

134 Note that while some cellular automata, including the paradigmatic ‘Game of Life’  
135 introduced by Conway<sup>17</sup>, are well known to be universal computing devices, the question of  
136 programmable pattern formation is distinct from universal computing: In the context of computing,  
137 both the ‘program’ and the ‘input data’ are specified by the initial state of the CA. In contrast, for  
138 programmable pattern formation the initial state is arbitrary, while the target pattern is encoded in  
139 the state transitions of the organizer cells, and the patterning algorithm is specified by the update  
140 rule and the topology of the system.

141

#### 142 **Some update rules enable complete programmability.**

143 The discrete model facilitates an efficient computational test for complete programmability, which  
144 relies on the representation of the patterning dynamics by a directed graph (Fig. 2a-c). In this  
145 ‘patterning graph’, each patterning state of the system is represented by a node. A connecting arrow  
146 from node  $X$  to node  $Y$  indicates that an input signal  $B$  exists that takes the system from state  $X$  to  
147 state  $Y$  in one step, i.e.,  $Y = F(X, B)$ . The arrow is labeled with this input signal  $B$  (if multiple  
148 signals exist, the arrow gets multiple labels). Complete programmability is then equivalent to the

149 statement that there is a path from every node to every other node in the patterning graph, i.e., that  
150 the graph is strongly connected<sup>18</sup> (Fig. 2). Strong connectivity of directed graphs with tens of  
151 thousands of nodes can be rapidly tested with standard algorithms (Suppl. Notes S1.1).

152 We applied this test in systems with different sizes and topologies, for the minimal model of  
153  $k = 2$  states, where the number of possible update functions  $f$  is only  $2^{(2^3)} = 256$ . Given that our  
154 underlying model is symmetric with respect to the spatial directions 'left' and 'right', and also with  
155 respect to the internal states '0' and '1', the set of 256 rules can be split into 88 equivalence classes,  
156 which we refer to as 'distinct rules'. We tested all rules and found that there are several which  
157 enable complete programmability of pattern formation. The number of such rules depends on the  
158 topology and decreases with the system size  $L$  (Fig. 2d). Strikingly, however, for systems of size  
159  $L \geq 9$  the numbers no longer decrease, and the set of remaining rules is unchanged up to the  
160 maximum size that we were able to test numerically. This observation suggests that a subset of  
161 'programmable rules' enables complete programmability of pattern formation for systems with a  
162 fixed topology but any size. This subset contains ten distinct rules for linear topology and seven  
163 distinct rules for circular topology (Fig. 2d,e). In the linear topology, the optimal placement of  
164 organizer cell(s) with respect to the number of programmable rules is at the boundaries (Suppl.  
165 Notes S1.2 and Fig. S1). The ten distinct rules for linear topology were also independently<sup>19</sup>  
166 identified by another study<sup>20,21</sup>.

167 While complete programmability, as defined above, is a global property of the patterning  
168 graph (strong connectivity), the ten rules of Fig. 2e also stand out in a local property of the  
169 patterning graph, the in-degree distribution. In a directed graph, the in-degree of a node corresponds  
170 to the number of incoming arrows. Fig. 2f shows histograms of the in-degrees of all nodes in the  
171 patterning graphs of one programmable and two non-programmable rules. For comparison, Fig. 2f  
172 also shows the in-degree distribution of a randomized graph, in which the outgoing links from each  
173 node are randomly reassigned to any target node. These examples illustrate an empirical property

174 (Fig. S2 and Suppl. Notes S2): Whereas programmable rules have an in-degree distribution with  
175 only a single peak at in-degree two (for one organizer cell) or four (for two organizer cells), non-  
176 programmable rules display a broad in-degree distribution, which depends on the specific rule and  
177 differs from the distribution for a randomized graph. This indicates that one can distinguish  
178 programmable from non-programmable rules already based on the local structural statistics of the  
179 patterning graph, which for large systems could also be sampled from a randomly chosen subset of  
180 nodes. We will see further below that the number of programmable rules increases rapidly with the  
181 number  $k$  of states.

182

### 183 **Different mechanisms for complete programmability of patterning**

184 To illustrate the mechanisms by which complete programmability is achieved, Fig. 3 displays the  
185 spatio-temporal dynamics for several rules, topologies, and target patterns. The simplest mechanism  
186 is that of Fig. 3a, where a single organizer cell feeds its changing state into a linear array of bulk  
187 cells, in this case from the left edge. The bulk cells propagate the received information to their  
188 neighbors, effectively writing a temporal signal into a spatial pattern. This mechanism is  
189 reminiscent of the clock-and-wavefront mechanism in vertebrate somitogenesis, which relies on a  
190 temporal oscillation that is converted into a spatial stripe pattern<sup>22–25</sup>.

191 The examples in Fig. 3b-e display more complex behavior, suggesting alternative modes of  
192 programmable pattern formation. Fig. 3b displays a variant of the mechanism in Fig. 3a, which  
193 updates a cell to the inverted state of its left neighbor. Thereby, this rule produces a dynamics where  
194 the pattern oscillates as it is pushed from the organizer cell into the bulk. In both cases, the initial  
195 state of the system is completely erased during the patterning process, such that the sequence  $O^t$  of  
196 organizer inputs is independent of the initial pattern  $X^0$ . In contrast, a third rule (Fig. 3c) generates  
197 the same target pattern partially from the initial state, exploiting the computational power of the

198 update rule. As a consequence, the target pattern is reached more rapidly. Figs. 3d and e illustrate  
199 programmable pattern formation with simultaneous input from two organizer cells. Only update  
200 rules that are affected by input signals from both the left and the right side can simultaneously  
201 process information from two organizer cells. In the case of Fig. 3d, rule 90 produces the target  
202 pattern by symmetrically using information from both organizer cells, while Fig. 3e illustrates an  
203 asymmetric pattern formation process with rule 30, where information from the left side is  
204 preferentially used. Finally, Fig. 3f-h display kymographs for cases where a single organizer cell is  
205 embedded in a ring of bulk cells. In Fig. 3f, the information from the organizer cell is pushed only  
206 in one direction, such that the patterning process is analogous to that of Fig. 3a for the linear cell  
207 array. In contrast, Fig. 3g illustrates a case where the target pattern is computed (by rule 30) from  
208 the initial pattern. The most complex example is that of Fig. 3h, where rule 30 propagates  
209 information from the organizer cell to both sides, producing an ‘interference’ phenomenon when the  
210 two signals meet, which results in a much longer time required to reach the target pattern.

211 The unifying principle underlying these examples is linear transport of patterning  
212 information from one or multiple sources, with concurrent processing of this information by the  
213 bulk cells. The behavior is visually simple only if the bulk cells merely pass on the information they  
214 receive, while additional signal integration with their internal states typically generates complex  
215 spatio-temporal dynamics.

216

### 217 **Time to reach the target pattern**

218 The examples in Fig. 3 suggest that systems with programmable rules are completely programmable  
219 in linear time. With simple unidirectional transport of patterning information (as in Fig. 3a, b, and  
220 f), the maximum number of update steps in an optimal path is equal to the number  $L$  of bulk cells.  
221 With two organizer cells, this maximum can be cut in half, as seen in Fig. 3d. Furthermore, in some

222 cases the update rule can construct a portion of the target pattern from the initial pattern to speed up  
223 the pattern formation process (Fig. 3c and g).

224 We obtain a global view of the patterning dynamics by considering the ensemble of all  
225 possible initial states of the system and monitoring how this ensemble progressively shrinks  
226 towards a single point in state space (the target pattern). A convenient observable to characterize  
227 these dynamics is the time-dependent “entropy”  $S(t) = \log_2(\Omega(t))$ , where  $\Omega(t)$  denotes the number  
228 of points in state space occupied by the ensemble at time  $t$ . As the patterning process proceeds from  
229 every possible initial state along every possible shortest path to the target state,  $S(t)$  decreases from  
230  $L$  to zero. The computed time traces  $S(t)$  for a system of size  $L = 8$  with the different  
231 programmable rules are shown in Fig. 3i (circular topology) and Fig. 3j (linear topology with  
232 organizer cells at both ends). In the latter case,  $S(t)$  decreases roughly linearly for all rules,  
233 corresponding to an exponentially shrinking volume of the pattern ensemble in state space. The  
234 velocity of this “entropy reduction” is either  $\frac{\Delta S}{\Delta t} = -1$  or  $-2$  (dashed and solid line, respectively). In  
235 the circular topology,  $S(t)$  either decreases linearly with slope  $-1$ , or displays a slower decrease  
236 with variable slope. Taken together, the dynamics of  $S(t)$  is consistent with the spectrum of  
237 behaviors observed in the examples of Fig. 3a-h. It is also consistent with the behavior of the  
238 average shortest path length in the patterning graph (Suppl. Notes S3).

### 239 240 **Conservation principle and programmable rules for $k$ -state systems**

241 Intuitively it is clear that faithful transport of patterning information from organizer cells into the  
242 bulk requires a conservation principle. This notion is formalized by the concept of bijectivity. We  
243 define a rule  $f$  to be left-bijective, if the mapping  $x \rightarrow y$  with  $y = f(x, x_i^t, x_{i+1}^t)$  is bijective for  
244 each combination of  $x_i^t, x_{i+1}^t$  values (Fig. 4a,b). For a left-bijective rule every possible output  $x_i^{t+1}$   
245 can be reached by choosing an appropriate left input  $x_{i-1}^t$ , irrespective of  $x_i^t$  and  $x_{i+1}^t$ . This property

246 suffices to guarantee that one can find a series of inputs  $O^t$  from an organizer cell on the left to  
247 produce any target pattern in the bulk cell array (Fig. 4c and Suppl. Notes S1.3, S1.4). Similarly, if  
248 an update rule is right-bijective, it permits complete programmability of pattern formation from an  
249 organizer cell on the right. The argument of Fig. 4c is constructive in the sense that it not only  
250 guarantees the existence of a suitable organizer sequence  $O^t$  to reach the target pattern, but it  
251 provides a recipe to explicitly construct  $O^t$ , given the update rule as well as the initial and the target  
252 pattern (Suppl. Notes S1.5). This recipe confirms the distinction between the simple rules of Fig.  
253 3a, b and the other programmable rules with more complex behavior: For the simple rules, the  
254 organizer sequences  $O^t$  can be chosen independent of the initial state of the system, whereas for the  
255 complex rules, the construction of  $O^t$  requires knowledge of the initial state (see the classification  
256 of rules in Fig. 2e). Rules that are both left- and right-bijective can faithfully transport information  
257 from both sides, which can speed up the patterning process with two organizer cells, as seen in Fig.  
258 3d and e. However, in the circular topology, rules that are both left- and right-bijective do not  
259 enable complete programmability, since they are unable to convert initially symmetric patterns into  
260 an asymmetric one (Suppl. Notes S1.6).

261       Importantly, the argument of Fig. 4c is valid for any length  $L$  of the system, for any number  
262  $k$  of cell states, and it can also be generalized to obtain a constructive recipe for update rules that  
263 depend on larger neighborhoods of cells (Suppl. Notes S1.7). The bijectivity property can be used to  
264 show that with  $k$  cell states there are at least  $k!^{k^2}$  programmable rules before taking into account  
265 symmetries, but that the fraction of bijective rules within all rules decreases rapidly with  $k$  (Suppl.  
266 Notes S1.8). Furthermore, it follows (Suppl. Notes S1.9) that the maximal length of the shortest  
267 path from a given initial pattern to a desired target pattern is  $L$  in the case of one organizer cell, and  
268  $\frac{L}{2}$  for two organizer cells and both left- and right-bijective rules (or  $\frac{L+1}{2}$  when  $\frac{L}{2}$  is not an integer), as  
269 we had empirically seen above.

270

## 271 **Robustness against errors and error correction**

272 In real systems, the communication between subunits, as well as the information processing within  
273 subunits, are exposed to noise, causing some level of stochasticity in the dynamics. How sensitive  
274 programmable pattern formation is to such stochasticity is therefore a crucial question. To explore  
275 this question, we extend our model by introducing an error process. After executing the  
276 deterministic update rule, each cell stochastically switches to the opposite state with probability  $p$ ,  
277 or remains in its state with probability  $1 - p$ , independent of the state of its neighbors. This  
278 stochastic update models effects such as loss of memory (of the prior cell state), noise in the internal  
279 regulatory circuit that encodes the update rule, unreliable signal transmission from neighboring  
280 cells, and noise in the exact timing of state transitions. Since we consider a spatially and temporally  
281 homogenous system, we take  $p$  to be constant in time and space.

282 To monitor the impact of the stochasticity, we measure the reliability of the pattern  
283 formation process as a function of  $p$ . Specifically, we determine the probability that the final pattern  
284 has no error, i.e., that it matches the desired target pattern (Suppl. Notes S4.1). For programmable  
285 rules that take input from only one neighboring cell, this probability can be estimated as

$$\text{Prob}(\text{no error}) \sim (1 - p)^{\frac{1}{2}L(L-1)} = 1 - \frac{L}{2}(L - 1)p + \mathcal{O}(p^2),$$

286 since a system of size  $L$  reaches its target state after at most  $L$  steps, and errors in  $L(L - 1)/2$   
287 individual cell updates can have an influence on the final pattern (see Fig. 4). This error estimate  
288 helps to interpret our simulations of the model (Fig. 5). The reliability as a function of the error rate  
289  $p$  in a system of fixed size is shown in Fig. 5c for all programmable rules (red symbols), confirming  
290 that the estimate (solid red line) captures the essential behavior of the model. In particular, the  
291 reliability decreases linearly with  $p$  for small error rates (dashed red line), implying that all  
292 patterning schemes considered so far are very sensitive to errors.



293 The root cause of the high sensitivity to errors is the one-dimensional geometry of our  
294 model systems: A single failure breaks the “chain of command” from the organizer cells to the  
295 distant bulk cells. Given that most real systems have two- or three-dimensional arrangements of  
296 subunits, it is natural to extend the spatial dimension of our model. We focus on a two-dimensional  
297 extension of our model, in which  $K$  parallel cell lanes, each of length  $L$ , are connected to form a  
298 tube (see Fig. 5a, where periodic boundary conditions are applied in the vertical direction). The  
299 parallel lanes offer redundancy, which the cells can leverage to increase the reliability: They  
300 communicate with their lateral neighbors and apply a majority voting rule for their update (Fig. 5b),  
301 which in tissues could be mediated by diffusible signaling molecules. Along the axis of the tube  
302 cells follow the same rules as in the one-dimensional model above. The blue symbols in Fig. 5c  
303 show the reliability as a function of  $p$  for a tube with the same length  $L$  as the one-dimensional  
304 system (see caption for parameters and Suppl. Notes S4.1 for the numerical procedure). We observe  
305 a dramatic increase in reliability, caused by the ability of the lateral majority voting rule to correct  
306 isolated errors. The error correction changes the scaling of the reliability with  $p$  from linear to  
307 quadratic (dashed blue line). In fact, the observed behavior can be captured by an estimate (solid  
308 blue line) based on counting the number of arrangements of errors that cannot be corrected (Suppl.  
309 Notes S4.2). The expansion of this estimate for small  $p$  shows that

$$\text{Prob}(\text{no error}) \sim 1 - 2L^2 K p^2 + \mathcal{O}(p^3)$$

310 for the tube. The rules which only shift the state of the cell to the next cell perform best, since they  
311 spread errors the least (Suppl. Notes S4.3).

312

### 313 **Robustness against variable timing of organizer signals**

314 The above analysis showed that local organizers can steer the bulk cells into any one-dimensional  
315 target pattern using only local signals processed according to simple rules. However, this requires

316 precise timing in the switching of the organizer signals. Precise timing is also needed for the arrest  
317 of the patterning process when the target pattern is reached, because the target pattern is generally  
318 not a fixed point of the dynamics (programmable rules have only trivial stationary patterns). To  
319 explore the degree of programmability that can be achieved with less precise timing, we consider an  
320 alternative scheme, which uses update rules with nontrivial stationary patterns: For each organizer  
321 input, we let the system evolve until the pattern no longer changes before applying a new input.  
322 Together with each input, we also allow a global change of the update rule (same for all cells). In a  
323 developmental system, this would amount to a change in the interpretation of intercellular signals in  
324 different developmental stages, which is a known phenomenon, e.g. for the Toll signaling pathway  
325 of *Drosophila*<sup>1</sup>. The change could be triggered by a global signal, which does not need to be timed  
326 precisely, since the system runs into a stationary pattern at which it can stay for an extended time.  
327 Global changes of the update rule could in principle also be implemented in a synthetic DNA-based  
328 system (Suppl. Notes S5).

329 For simplicity, we refer to the combination of an input with an update rule as an  
330 'instruction'. We only use instructions that lead the system to a stationary state, avoiding those that  
331 lead to limit cycles. To construct an efficient search method for a protocol that steers the system  
332 from a given initial pattern to a desired target pattern, we first analyze the patterning graphs of all  
333 CA rules. For each rule and organizer input, we identify all attractors and their basins of attraction,  
334 which consist of all configurations from which the attractor is reachable (Fig. 6a). We then  
335 construct a single 'attractor graph' from all basins of attraction, by adding a directed link  $X \rightarrow Y$  for  
336 each pattern  $X$  in the attraction basin of pattern  $Y$ . Each link has an associated instruction. Using the  
337 attractor graph, we determine the instruction sequence by extracting the shortest path connecting  
338 two patterns (Suppl. Notes S3). This recipe minimizes the number of instructions, but other  
339 objective functions, such as minimizing the number of changes in the rule or the total time needed  
340 to reach the final attractor, could be implemented with similar methods.

341 We only consider the homogeneous initial condition (all cells in state `0') with no prior  
342 spatial information that could seed the generation of patterns. Not all patterns can be reached by this  
343 scheme for larger system sizes (Suppl. Notes S6.1). We performed an exhaustive analysis to  
344 determine the reachable patterns for grid sizes up to length  $L = 16$ . We fit the resulting data in the  
345 saturated range  $L \in [8, 16]$  and determined the number of reachable patterns to scale as  $1.89^L$   
346 (circular and linear topology with two organizer cells) and  $1.82^L$  (linear topology with one  
347 organizer cell), showing that even if not all patterns are reachable, an exponentially growing  
348 number is (Fig. 6c). Interestingly, approximately the same scaling applies for the linear topology if  
349 we weaken the assumption that the cellular automata can distinguish left from right, i.e., include  
350 only outer-totalistic rules in the attractor graph, which are agnostic to the directionality of the  
351 signals (Suppl. Notes S6.2). These empirical observations are consistent with the results of an  
352 analytical approach to determine the number of attractors of finite CA, which also indicates that the  
353 number of attractors for individual rules (except the identity rule 204) grows more slowly with  $L$   
354 than the total number  $2^L$  of possible patterns<sup>26</sup>.

355 To characterize the patterning dynamics, we calculated the average shortest path length in  
356 the attractor graph, i.e., the average minimal number of required instructions, to reach the accessible  
357 target patterns as a function of the system size  $L$ . The empirically observed linear dependence (Fig.  
358 6d) indicates that, even as the number of reachable patterns increases exponentially, the time,  
359 measured in number of instructions, to reach a target pattern increases only linearly with system  
360 size, as in our original scheme for programmable patterning (Fig. 3i,j).

361 Models for pattern formation processes can also be regarded as a means to compress the  
362 information required to specify a pattern. This notion is formalized by the concept of Kolmogorov  
363 complexity of a pattern, defined as the length of the shortest program for a Turing machine which  
364 outputs that pattern and halts<sup>27</sup>. Within our scheme, we can say that the complexity of a pattern is  
365 measured by the number of instructions needed to generate it starting from the homogeneous initial

366 condition. Empirically, the patterns which require the fewest instructions exhibit some periodicity,  
367 which makes them amenable to compression, while there is no obvious visible difference between  
368 the most complex reachable patterns and the unreachable patterns (Suppl. Notes S6.3, Fig. S15).

369

## 370 **DISCUSSION**

371 Programmable pattern formation in cellular systems is a remarkable phenomenon in biology, and a  
372 long-term goal for the design of synthetic multicellular systems<sup>28</sup>. Here, our objective was not to  
373 study any specific system, but to identify general schemes whereby local signals from organizer  
374 cells can direct global pattern formation. We chose a cellular automata-based modeling framework,  
375 which is sufficiently general to encompass a broad class of model systems, yet simple enough for  
376 explorative studies. For elementary cellular automata, in which cells have only two states and two  
377 neighbors, we performed an unbiased exhaustive analysis of all dynamical rules. We were then able  
378 to generalize some of our results to more complex systems. In particular, our approach led to the  
379 following findings: (i) Complete programmability of pattern formation by isolated organizer cells is  
380 possible only with a small fraction of distinct rules (Fig. 2), which fulfill a conservation principle  
381 for the transmission of patterning information (Fig. 4). (ii) While the detailed patterning dynamics  
382 implemented by each programmable rule is different (Fig. 3), the unifying principle can be  
383 interpreted as a generalization of the 'clock-and-wavefront' scheme underlying vertebrate  
384 somitogenesis, where a temporal signal is converted into a spatial pattern. (iii) Global pattern  
385 formation controlled by isolated locally acting organizers is intrinsically susceptible to errors, but  
386 the accuracy of pattern formation can be substantially improved with a simple error-correcting  
387 scheme based on local majority voting (Fig. 5). (iv) Programmable pattern formation controlled by  
388 organizer cells is generally sensitive to the timing of organizer inputs, but robustness against  
389 variable timing is achievable with organizers that have the additional ability to change the update  
390 rule of bulk cells, i.e., the way in which bulk cells interpret the received signals (Fig. 6).

391 Our results contribute towards a conceptual framework for constructing molecular or  
392 cellular systems with the ability of programmable pattern formation. DNA-based systems form a  
393 promising platform for molecular realizations of programmable pattern formation due to their  
394 programmability and information processing ability<sup>29,30</sup>. An elementary CA with the programmable  
395 rule 90 has already been implemented with DNA tiles<sup>31,32</sup> albeit not in a way that permits inputs  
396 from an organizer. Other DNA-based implementations, which are more complex but offer more  
397 flexibility, have also been proposed<sup>10</sup>. On the basis of these proposed designs, a biomolecular CA  
398 that allows for input signals controlling its patterning process could be implemented as described in  
399 Suppl. Notes S5.

400 Synthetic cell-like systems with the capability to communicate and process information  
401 have also been implemented, based on emulsion droplets<sup>9</sup> and liposomes<sup>33</sup>. Information processing  
402 within such synthetic cells is realized with artificial gene circuits, based on in vitro transcription or  
403 transcription-translation systems, whereas communication between neighboring cells is enabled, for  
404 instance, by dedicated protein pores<sup>28</sup>. A complementary path to achieve programmable pattern  
405 formation in cellular systems is to equip biological cells with engineered sensing and response  
406 systems<sup>34,35</sup>.

407 Given that our model was not designed to mimick any specific system, it is noteworthy that  
408 it led us to a principle of programmable pattern formation, which can be regarded as a  
409 generalization of the clock-and-wavefront scheme underlying vertebrate somitogenesis<sup>22-24</sup>. The  
410 basic principle is the same as that of a tape recorder, where a temporal audio signal is written into a  
411 spatial magnetic pattern. In the case of the clock-and-wavefront scheme, a periodic gene expression  
412 signal generates a stripe pattern via a determination front, which sweeps the tissue and arrests cells  
413 in their current state. The patterning dynamics displayed in Fig. 3 generalizes the clock-and-  
414 wavefront scheme by allowing for (i) any target pattern, not just regular stripes, and (ii)  
415 simultaneous transport and processing of patterning information. While our model does not

416 implement a determination front, we considered an alternative scheme, in which the update rule of  
417 the bulk cells is also controlled by the organizers and the target pattern is stabilized dynamically.  
418 CA with changing update rules are interesting also from the computational perspective, since they  
419 were previously found to display capabilities linked to the computational problem of open-ended  
420 evolution<sup>36</sup>.

421         The simplicity of our model was key to obtaining rigorous results, but also poses limitations.  
422 One important limitation is the restriction to discrete internal cell states. Pattern formation processes  
423 are typically described by nonlinear dynamical systems with multistable behavior, such that  
424 qualitatively distinct patterning states, e.g., gene expression 'on' or 'off', can emerge in spatially  
425 adjacent regions. Our model adopts a coarse-grained level of description, which already assumes  
426 the existence of such discrete states and ignores all intermediate states. For a biological system,  
427 discrete update rules represent logic-based models of a biochemical signaling network<sup>37</sup>. For other  
428 types of systems, discrete update rules typically also represent 'digital' approximations of the  
429 underlying 'analog' dynamics.

430         Another limitation is the one-dimensional arrangement of cells within our model, which  
431 permits only linear propagation of patterning information in space. This restriction is somewhat  
432 relaxed in our quasi-1D extension of the model (Fig. 5), where lateral signaling between cells is  
433 used for error correction. However, this extension does not address the more general question of  
434 programmable pattern formation in two or more dimensions, which remains open for future work.

435         We also did not include biological processes like cell growth, cell division and death, but  
436 assumed that the patterning process occurs in a group of cells with a static arrangement, as for  
437 example in *caenorhabditis* vulva development<sup>15</sup>. Finally, we limited our study to a patterning  
438 scenario based on organizer cells. However, we found that the dynamical update rules of the bulk  
439 cells can also generate parts of the target pattern (Fig. 3), and considered an alternative scheme for  
440 programmable pattern formation, which combines patterning information from local organizers

441 with “distributed computation” of patterning information (Fig. 6). Bulk cells with more states, or  
442 larger neighborhoods for the update rule, will have more computational ability and will therefore  
443 enhance the potential for programmable pattern formation via distributed computation. Indeed, it is  
444 well known that cellular automata can serve as computing devices, with some even shown to be  
445 computationally universal<sup>38</sup>. In those cases, the initial state of the cellular automaton serves both as  
446 the program and the input data, while the update rule specifies the mechanism of the computer and  
447 the result of the computation is obtained from the state after time evolution. The situation is  
448 different for programmable pattern formation: In our “organizer scenario”, the initial state of the  
449 system can be simple, e.g., homogeneous, while the input data (patterning information) is supplied  
450 as a time-dependent local signal. Bijective update rules enable universal pattern formation with this  
451 scenario. Interestingly, these bijective rules were among the “illegal” rules excluded in Wolfram’s  
452 pioneering study on the statistical mechanics of cellular automata<sup>11</sup>, due to their violation of the  
453 quiescence and isotropy conditions.

454 Our question of programmability is closely related to the question of ‘controllability’ in the  
455 field of control theory. Control theory provides a general mathematical framework to analyze the  
456 control of dynamical systems<sup>39</sup>. It formalizes the intuitive notion of ‘controllability’ as the ability to  
457 steer a dynamical system to any desired state from any initial state by appropriate signals. A focus  
458 of recent research has been on the control of complex networks<sup>40,41</sup>, a broad class of dynamical  
459 systems ranging from networks of protein interactions<sup>42</sup> and neurons<sup>43</sup> to power grids<sup>44</sup>. Application  
460 of control theory concepts to linear dynamics on networks with complex topologies led to insights  
461 about the relation between network topology and the controllability of its dynamics<sup>40,41</sup>. Here, we  
462 focused instead on systems with simple topologies but more complex dynamics and studied how the  
463 ability to control pattern formation depends on the dynamical rules that propagate patterning  
464 information into the system.

465           In conclusion, programmable pattern formation connects the experimental fields of synthetic  
466 and systems biology to theoretical research on self-organization, computation, and control. We  
467 established simple scenarios for programmable pattern formation in cellular systems based on local  
468 organizers. Our results provide a rigorous basis for the analysis of more complex patterning  
469 scenarios, and for a conceptual framework to design synthetic molecular and cellular systems.



470 **REFERENCES**

- 471 1. Wolpert, L. *Principles of development*. 5<sup>th</sup> ed. (Oxford University Press, Oxford, 2015).
- 472 2. Prud'homme, B., Gompel, N. & Carroll, S. B. Emerging principles of regulatory evolution.  
473 *PNAS* 104 Suppl 1, 8605–8612; 10.1073/pnas.0700488104 (2007).
- 474 3. de Robertis, E. M. Spemann's organizer and self-regulation in amphibian embryos. *Nat. Rev.*  
475 *Mol. Cell Biol.* 7, 296–302; 10.1038/nrm1855 (2006).
- 476 4. Rubenstein, M., Cornejo, A. & Nagpal, R. Robotics. Programmable self-assembly in a  
477 thousand-robot swarm. *Science* 345, 795–799; 10.1126/science.1254295 (2014).
- 478 5. Slavkov, I. *et al.* Morphogenesis in robot swarms. *Sci. Robot.* 3, eaau9178;  
479 10.1126/scirobotics.aau9178 (2018).
- 480 6. Farkas, I., Helbing, D. & Vicsek, T. Mexican waves in an excitable medium. *Nature* 419, 131–  
481 132; 10.1038/419131a (2002).
- 482 7. Gerling, T., Wagenbauer, K. F., Neuner, A. M. & Dietz, H. Dynamic DNA devices and  
483 assemblies formed by shape-complementary, non-base pairing 3D components. *Science* 347,  
484 1446–1452; 10.1126/science.aaa5372 (2015).
- 485 8. Qian, L., Winfree, E. & Bruck, J. Neural network computation with DNA strand displacement  
486 cascades. *Nature* 475, 368–372; 10.1038/nature10262 (2011).
- 487 9. Weitz, M. *et al.* Diversity in the dynamical behaviour of a compartmentalized programmable  
488 biochemical oscillator. *Nat. Chem.* 6, 295–302; 10.1038/nchem.1869 (2014).
- 489 10. Yin, P., Sahu, S., Turberfield, A. J. & Reif, J. H. Design of Autonomous DNA Cellular  
490 Automata. In *DNA computing. 11<sup>th</sup> International Workshop on DNA Computing*. DNA11,  
491 London, ON, Canada, June 6 - 9, 2005 ; revised selected papers, edited by A. Carbone & N. A.  
492 Pierce (Springer, Berlin, 2006), Vol. 3892, pp. 399–416.
- 493 11. Wolfram, S. Statistical mechanics of cellular automata. *Rev. Mod. Phys.* 55, 601–644;  
494 10.1103/RevModPhys.55.601 (1983).

- 495 12. Deutsch, A. & Dormann, S. *Cellular Automaton Modeling of Biological Pattern Formation.*  
496 *Characterization, Applications, and Analysis* (Birkhäuser Boston, Boston, MA, 2005).
- 497 13. Manukyan, L., Montandon, S. A., Fofonjka, A., Smirnov, S. & Milinkovitch, M. C. A living  
498 mesoscopic cellular automaton made of skin scales. *Nature* 544, 173–179; 10.1038/nature22031  
499 (2017).
- 500 14. Perrimon, N., Pitsouli, C. & Shilo, B.-Z. Signaling mechanisms controlling cell fate and  
501 embryonic patterning. *Cold Spring Harb. Perspect. Biol.* 4, a005975;  
502 10.1101/cshperspect.a005975 (2012).
- 503 15. Hoyos, E. *et al.* Quantitative variation in autocrine signaling and pathway crosstalk in the  
504 *Caenorhabditis vulval* network. *Curr. Biol. : CB* 21, 527–538; 10.1016/j.cub.2011.02.040  
505 (2011).
- 506 16. Nehaniv, C. L. Asynchronous automata networks can emulate any synchronous automata  
507 network. *Int. J. Algebra Comput.* 14, 719–739; 10.1142/S0218196704002043 (2004).
- 508 17. Gardner, M. Mathematical Games. The fantastic combinations of John Conway’s new solitaire  
509 game of “life”. *Sci. Am.* 223, 120–123; 10.1038/scientificamerican1070-120 (1970).
- 510 18. Newman, M. E. J. *Networks. An introduction* (Oxford Univ. Press, Oxford, 2010).
- 511 19. Ramalho, T. Information processing in biology: A study on signaling and emergent  
512 computation. Dissertation. Ludwig-Maximilian-Universität, 10.5282/edoc.18807 (2015).
- 513 20. Bagnoli, F., El Yacoubi, S. & Rechtman, R. Toward a boundary regional control problem for  
514 Boolean cellular automata. *Nat Comput* 17, 479–486; 10.1007/s11047-017-9626-1 (2018).
- 515 21. Dridi, S., Yacoubi, S. E. & Bagnoli, F. Boundary Regional Controllability of Linear Boolean  
516 Cellular Automata Using Markov Chain. In *Recent Advances in Modeling, Analysis and Systems*  
517 *Control: Theoretical Aspects and Applications*, edited by E. H. Zerrick, S. Melliani & O. Castillo  
518 (Springer International Publishing, Cham, 2020), Vol. 243, pp. 37–48.

- 519 22. Oates, A. C., Morelli, L. G. & Ares, S. Patterning embryos with oscillations: structure, function  
520 and dynamics of the vertebrate segmentation clock. *Development* 139, 625–639;  
521 10.1242/dev.063735 (2012).
- 522 23. Cooke, J. & Zeeman, E. C. A clock and wavefront model for control of the number of repeated  
523 structures during animal morphogenesis. *J. Theor. Biol.* 58(2), 455–476; 10.1016/S0022-  
524 5193(76)80131-2 (1976).
- 525 24. Hubaud, A. & Pourquié, O. Signalling dynamics in vertebrate segmentation. *Nat. Rev. Mol. Cell*  
526 *Biol.* 15, 709–721; 10.1038/nrm3891 (2014).
- 527 25. Naoki, H. *et al.* Noise-resistant developmental reproducibility in vertebrate somite formation.  
528 *PLoS Comput. Biol* 15, e1006579; 10.1371/journal.pcbi.1006579 (2019).
- 529 26. Twining, C. J. & Binder, P.-M. Enumeration of limit cycles in noncylindrical cellular automata.  
530 *J. Stat. Phys.* 66, 385–401; 10.1007/BF01060073 (1992).
- 531 27. Cover, T. M. & Thomas, J. A. *Elements of information theory*. 2<sup>nd</sup> ed. (Wiley-Interscience,  
532 Hoboken, N.J, 2006).
- 533 28. Dupin, A. & Simmel, F. C. Signalling and differentiation in emulsion-based multi-  
534 compartmentalized in vitro gene circuits. *Nat. chem.* 11, 32–39; 10.1038/s41557-018-0174-9  
535 (2019).
- 536 29. Chatterjee, G., Dalchau, N., Muscat, R. A., Phillips, A. & Seelig, G. A spatially localized  
537 architecture for fast and modular DNA computing. *Nat. Nanotechnol.* 12, 920–927;  
538 10.1038/nnano.2017.127 (2017).
- 539 30. Zadorin, A. S. *et al.* Synthesis and materialization of a reaction-diffusion French flag pattern.  
540 *Nat. Chem.* 9, 990–996; 10.1038/nchem.2770 (2017).
- 541 31. Rothmund, P. W. K., Papadakis, N. & Winfree, E. Algorithmic self-assembly of DNA  
542 Sierpinski triangles. *PLoS Biol.* 2, e424; 10.1371/journal.pbio.0020424 (2004).

- 543 32. Barish, R. D., Schulman, R., Rothemund, P. W. K. & Winfree, E. An information-bearing seed  
544 for nucleating algorithmic self-assembly. *PNAS* 106, 6054–6059; 10.1073/pnas.0808736106  
545 (2009).
- 546 33. Adamala, K. P., Martin-Alarcon, D. A., Guthrie-Honea, K. R. & Boyden, E. S. Engineering  
547 genetic circuit interactions within and between synthetic minimal cells. *Nat. Chem.* 9, 431–439;  
548 10.1038/nchem.2644 (2017).
- 549 34. Morsut, L. *et al.* Engineering Customized Cell Sensing and Response Behaviors Using  
550 Synthetic Notch Receptors. *Cell* 164, 780–791; 10.1016/j.cell.2016.01.012 (2016).
- 551 35. Toda, S., Blauch, L. R., Tang, S. K. Y., Morsut, L. & Lim, W. A. Programming self-organizing  
552 multicellular structures with synthetic cell-cell signaling. *Science* 361, 156–162;  
553 10.1126/science.aat0271 (2018).
- 554 36. Adams, A., Zenil, H., Davies, P. C. W. & Walker, S. I. Formal Definitions of Unbounded  
555 Evolution and Innovation Reveal Universal Mechanisms for Open-Ended Evolution in  
556 Dynamical Systems. *Sci. Rep.* 7, 997; 10.1038/s41598-017-00810-8 (2017).
- 557 37. Morris, M. K., Saez-Rodriguez, J., Sorger, P. K. & Lauffenburger, D. A. Logic-based models  
558 for the analysis of cell signaling networks. *Biochemistry* 49, 3216–3224; 10.1021/bi902202q  
559 (2010).
- 560 38. Wolfram, S. Computation theory of cellular automata. *Commun. Math. Phys.* 96, 15–57;  
561 10.1007/BF01217347 (1984).
- 562 39. Schulz, M. (ed.). *Control Theory in Physics and other Fields of Science. Concepts, Tools, and*  
563 *Applications* (Springer-Verlag, Berlin Heidelberg, 2006).
- 564 40. Liu, Y.-Y., Slotine, J.-J. & Barabasi, A.-L. Controllability of complex networks. *Nature* 473,  
565 167–173; 10.1038/nature10011 (2011).
- 566 41. Liu, Y.-Y. & Barabási, A.-L. Control principles of complex systems. *Rev. Mod. Phys.* 88;  
567 10.1103/RevModPhys.88.035006 (2016).

- 568 42. Wuchty, S. Controllability in protein interaction networks. *PNAS* 111, 7156–7160;  
569 10.1073/pnas.1311231111 (2014).
- 570 43. Schiff, S. J. *Neural control engineering. The emerging intersection between control theory and*  
571 *neuroscience* (MIT Press, Cambridge, MA, 2012).
- 572 44. Cornelius, S. P., Kath, W. L. & Motter, A. E. Realistic control of network dynamics. *Nat.*  
573 *Commun.* 4, 1942; 10.1038/ncomms2939 (2013).

574

## 575 **ACKNOWLEDGEMENTS**

576 We are grateful to Kilian Vogele and Friedrich Simmel for helpful discussions. This work is  
577 supported by the German Research Foundation via the collaborative research center SFB1032 and  
578 the Excellence Cluster “ORIGINS” through UG.

579

## 580 **AUTHOR CONTRIBUTIONS**

581 All authors designed the research and analyzed the data. T.R., S.K., H.W. performed simulations,  
582 T.R., S.K., U.G. wrote the paper.

583

## 584 **COMPETING INTERESTS**

585 The authors declare no competing interests.

586

## 587 **DATA AND CODE AVAILABILITY**

588 The data that support the findings of this study, as well as the computer code used to generate this  
589 data, are available from the corresponding author upon reasonable request.

590

591 **FIGURES & FIGURE LEGENDS**

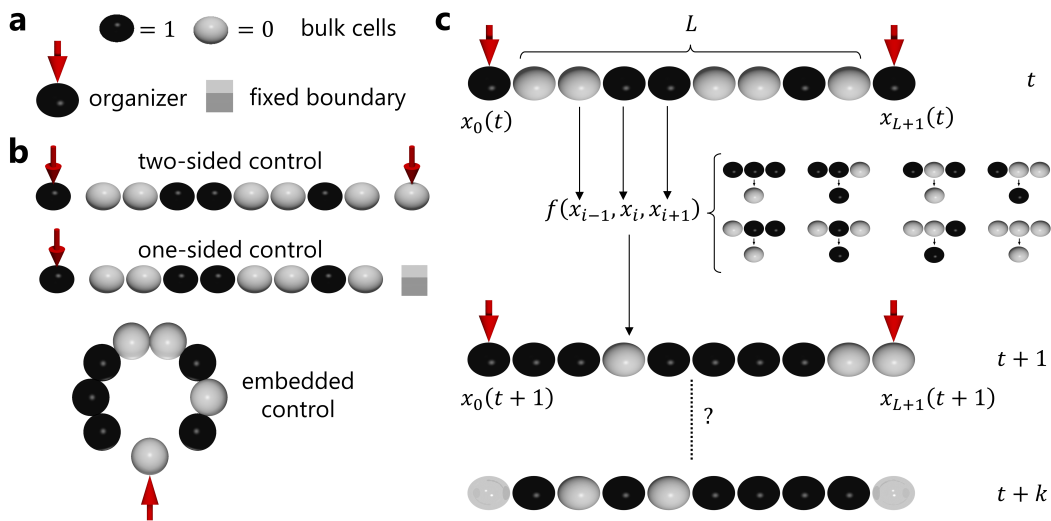

592

593 **Figure 1. Programmable pattern formation within a cellular automaton (CA) model.** (a) The model features bulk  
 594 cells (spheres) and organizer cells (marked by red arrow). The state of cells is represented by their color. Fixed  
 595 boundary cells (boxes) can also be regarded as organizer cells that never change their state. (b) We consider three types  
 596 of cell arrangement: Linear, with either one or two organizer cells, and circular. (c) The patterning dynamics of bulk  
 597 cells follows a cellular automaton rule. The time-dependent state  $x_i(t)$  of each of the  $L$  bulk cells is updated according  
 598 to  $x_i(t+1) = f(x_{i-1}(t), x_i(t), x_{i+1}(t))$ , with a rule  $f$  that maps every triple of input states  $(x_{i-1}(t), x_i(t), x_{i+1}(t))$   
 599 to an output state  $x_i(t+1)$ , as specified by a transition table (small spheres). The rules are enumerated by translating the  
 600 pattern of output states, ordered by the descending binary equivalent of the input states, into a binary number (here:  
 601  $01010110_2$ , i.e., rule 86). The patterning process is controlled by the local dynamics of the organizer cells, which  
 602 supply the patterning input. Programmable pattern formation in a cell arrangement with a given update rule refers to the  
 603 ability of the organizer cell(s) to reproducibly steer the bulk cells to different target patterns, using appropriate  
 604 sequences of signals (see main text).

605

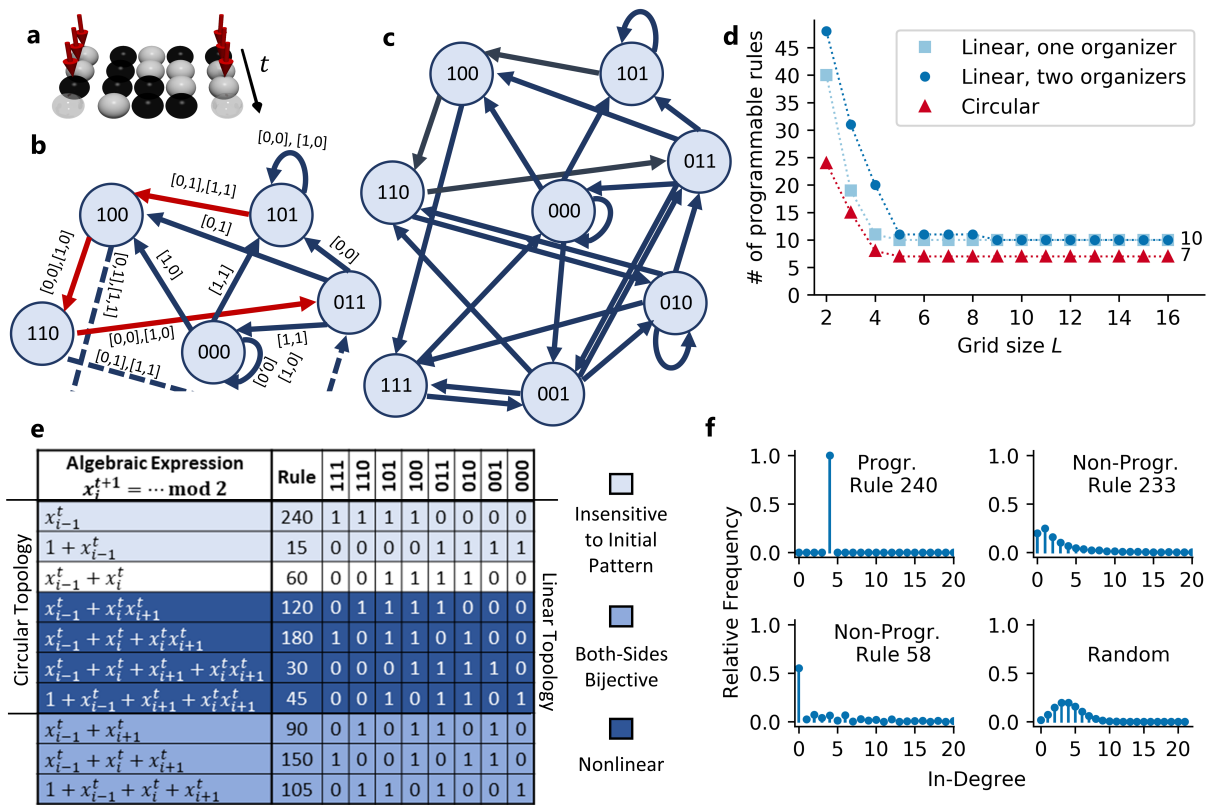

606

607 **Figure 2. Patterning graph.** (a) Illustration of the patterning dynamics of a small system ( $L = 3$ ), steered from initial  
 608 pattern 101 to target pattern 011 with two-sided control under rule 86 (cf. Fig. 1). (b) Part of the corresponding  
 609 patterning graph, with nodes representing patterns and arrows possible transitions. The organizer inputs that can trigger  
 610 a transition are indicated next to the corresponding arrow, e.g., [0,0] when the left and right organizer cell both supply a  
 611 '0' signal (sometimes multiple input combinations are possible). The path corresponding to (a) is highlighted in red. (c)  
 612 A system with a given update rule permits programmable pattern formation, if the full patterning graph is strongly  
 613 connected, i.e., there is a path from every node to every other node (regardless of the required inputs). (d) The number  
 614 of distinct programmable rules decreases monotonically with the system size and reaches a plateau-value (10 for linear  
 615 topology, 7 for circular topology). (e) The update rules that remain programmable for all system sizes with circular  
 616 (first 7) and linear topology (all shown rules), listed in their algebraic form, decimal rule number, and update map.  
 617 Different shades indicate properties of the rules that are discussed in the main text. (f) Statistical characterization of  
 618 patterning graphs by their in-degree distribution (linear systems with two organizer cells,  $L = 16$  bulk cells, and three  
 619 different exemplary rules; distributions shown up to in-degree 20). All programmable rules have the same distribution  
 620 as the shown rule 240, whereas the distribution of non-programmable rules is broad (shown examples: rule 233 and 58),  
 621 except for the *identity* and *complement* rule (distributions for all rules shown in Fig. S2). For comparison, the in-degree  
 622 distribution of a randomized graph is also shown (random redirection of arrows to any node with equal probability).



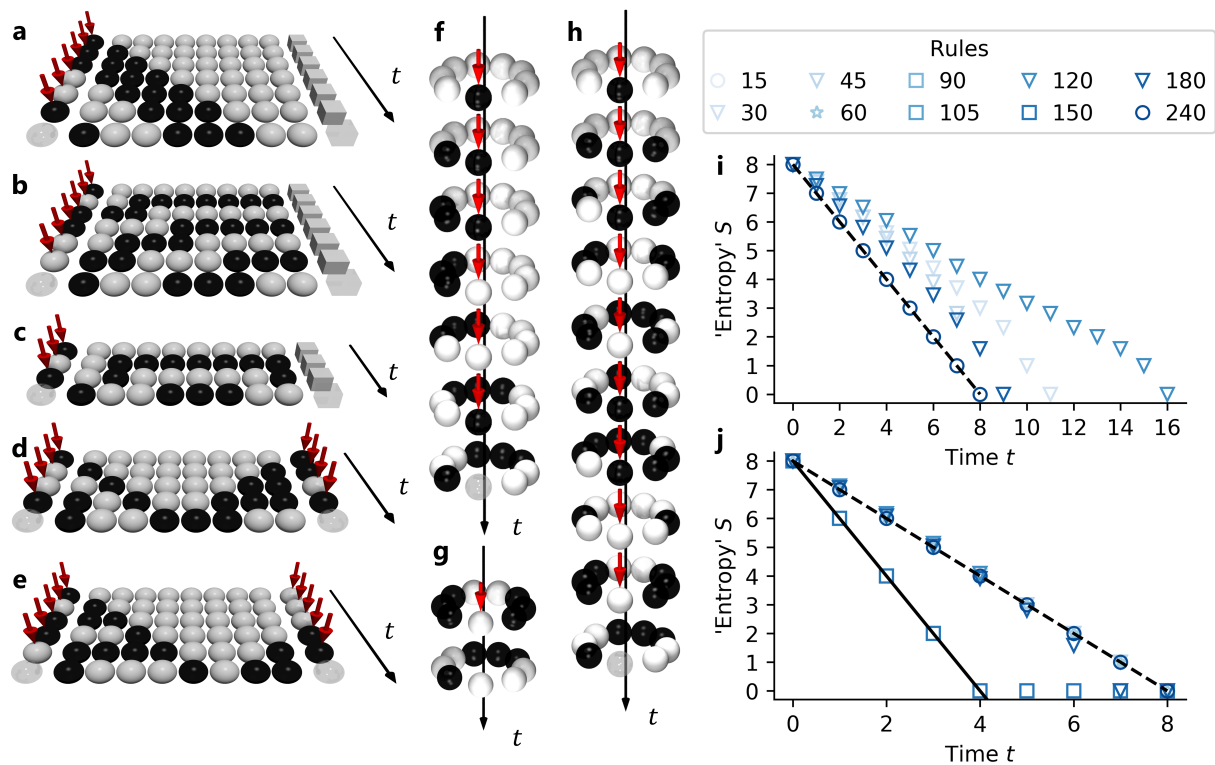

623

624 **Figure 3. Patterning dynamics.** Exemplary kymographs show the patterning dynamics of different systems, each with  
 625  $L = 8$  bulk cells, but different cell arrangements and update rules: (a) linear system with one organizer cell and rule  
 626 240, (b) rule 15, and (c) rule 105, (d) linear system with two organizer cells with rule 90, (e) two-sided control with rule  
 627 30 and a different target pattern, (f) circular system with embedded organizer cell and rule 240, (g) rule 30 starting from  
 628 a non-homogeneous initial state, and (h) from a homogeneous initial state. (i) Characterization of the patterning  
 629 dynamics by the entropy-like observable  $S(t)$ , a logarithmic measure of the number of different patterns that remain  
 630 after  $t$  update steps, if the patterning process is started from the ensemble of all possible initial states (see main text).  
 631 The data shows the time-dependence of  $S(t)$  for different update rules (symbols) in a circular topology with the same  
 632 target pattern as in (f). The dashed line marks  $S = -t + L$  for comparison. The symbols for the rules are chosen  
 633 according to the four categories introduced in Fig. 2e. (j) As in (i), but for linear topology with two organizers. The  
 634 solid line additionally marks  $S = -2t + L$  for comparison. The behavior shown for this particular target pattern is  
 635 generic, as can be seen from Figs. S3 – S5, which show the minimum, maximum and average  $S(t)$  over all patterns.



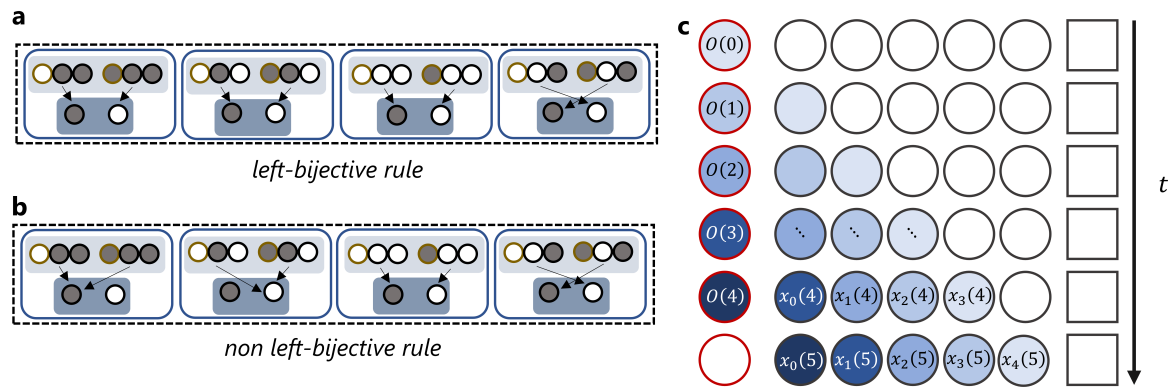

636

637 **Figure 4: Construction of the organizer sequence for a left-bijective update rule.** (a) Illustration of a left-bijective  
 638 rule for an elementary two-state cellular automaton. The eight possible input configurations are grouped into four pairs  
 639 (light blue background) according to the states of their middle and right-hand cells (dark boundaries). For each of these  
 640 pairs, the rule establishes a one-to-one mapping between the state of its left input cell (light boundary) and its output  
 641 (dark blue background). Fig. S6 illustrates the bijectivity of all programmable rules in a similar way. (b) In contrast, a  
 642 rule that maps at least one pair of input states onto the same output state is not left-bijective (first and second pair in the  
 643 shown example). (c) Illustration of the construction scheme for the organizer sequence  $O(t)$  that steers an initial pattern  
 644 to a desired target pattern. In this example, the system has  $L = 5$  bulk cells and an organizer cell on the left (red  
 645 boundary). The construction scheme determines the organizer sequence by backward propagation from the target  
 646 pattern, and explicitly demonstrates that bijectivity implies programmability. All white cells are not influenced by the  
 647 organizer sequence  $O(t)$ , so their states can be computed from the initial pattern with the update rule. Back propagation  
 648 then begins by setting the value of the rightmost cell in the final pattern to the desired value  $x_4(5)$ . Since  $x_4(4)$  and  
 649  $x_5(4)$  are known, left-bijectivity guarantees that there is a value  $x_3(4)$  such that  $x_4(5)$  has the desired value. Similarly,  
 650 it is possible to set  $x_2(3)$  such that  $x_3(4)$  takes on the required value determined in the previous step. Iterating along the  
 651 diagonal with the lightest blue shade then fixes the first organizer input,  $O(0)$ . Back propagation of  $x_3(5)$  then fixes  
 652  $O(1)$  and so forth. Thus, bijectivity of the update rule suffices to construct an organizer sequence  $O(t)$  to steer a given  
 653 initial pattern into any desired target pattern.

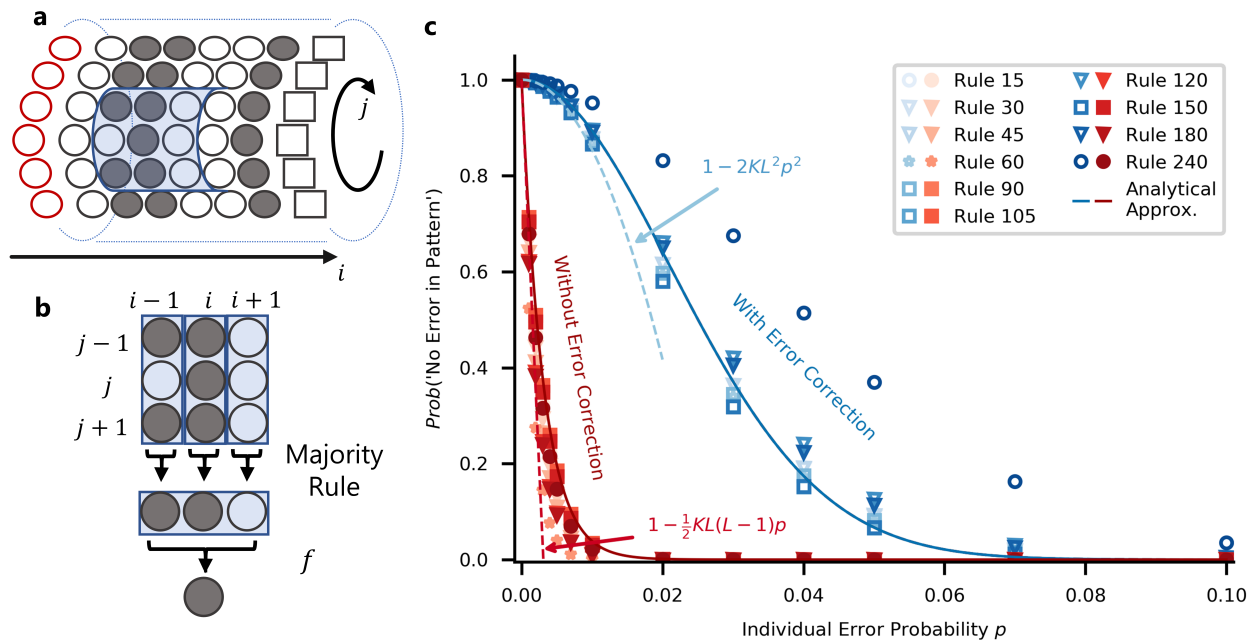

654

655 **Figure 5: Robustness against errors and error correction.** (a) To explore a mechanism for error correction, we  
 656 consider a cylindrical system with an array of organizer cells along the left edge and a fixed boundary condition along  
 657 the right edge. The update rule now takes input from a 9-cell neighborhood (shaded blue). (b) Given a 9-cell  
 658 neighborhood, the update rule applies “majority voting” in the vertical direction (index  $j$ ), establishing a consensus  
 659 triplet to which one of the 1D programmable rules  $f$  is applied, yielding the final output. (c) Computer simulations  
 660 (symbols) and analytical theory (lines) for systems with error correction by majority voting (red) compared to the case  
 661 without error correction (blue). As in Fig. 3, the symbols for different rules are chosen according to the four categories  
 662 introduced in Fig. 2e. In each case, a system of size  $L = K = 9$  was used. Sufficient simulation runs were performed to  
 663 estimate the plotted probability of arriving at the correct final pattern with a statistical error smaller than the symbol size  
 664 (see Suppl. Text S4). Convergence is demonstrated by the observation that rules for which the same error behavior is  
 665 expected (Rules 15 and 240) yield data points lying on top of each other. See Suppl. Text S4 for the analytical  
 666 approximations.

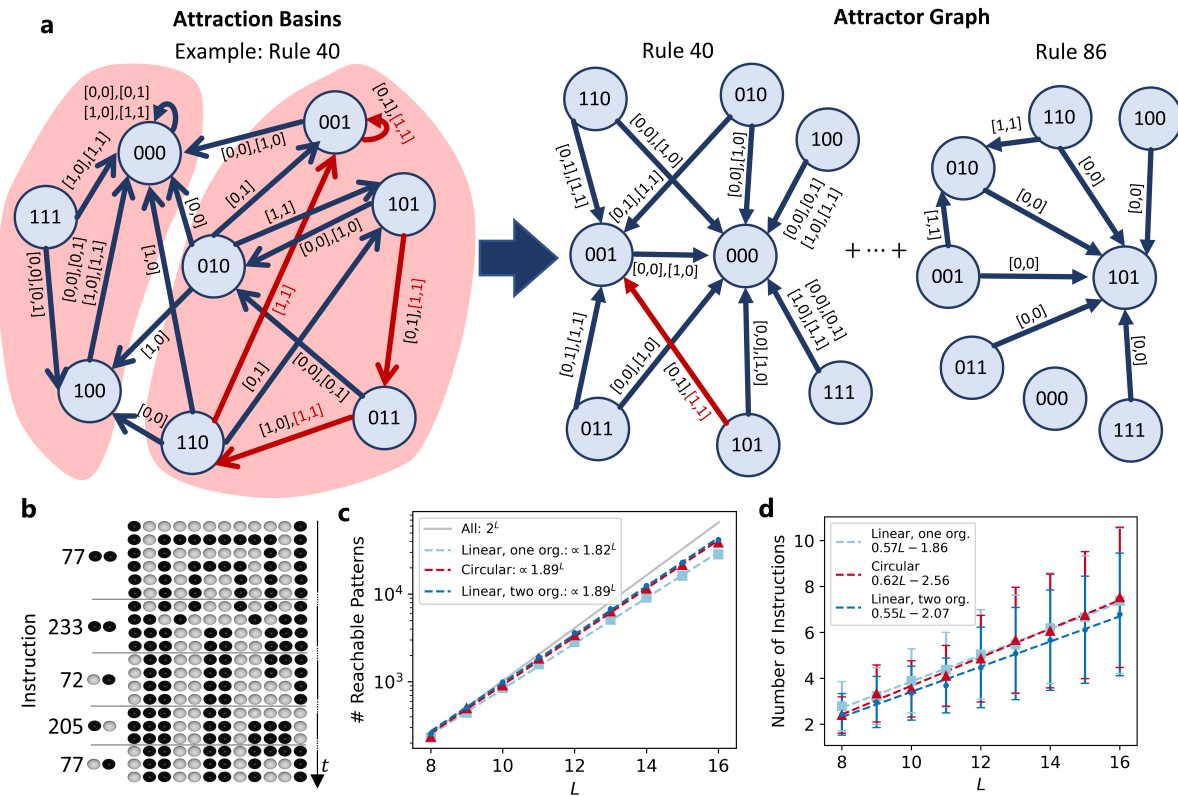

667

668 **Figure 6: Robustness against variable timing of organizer signals.** (a) To explore a mechanism for programmable  
 669 pattern formation that is robust against variable timing of organizer signals, we consider an alternative scheme for  
 670 programmable pattern formation, which uses all update rules with nontrivial stationary patterns (see main text). Left:  
 671 Example of a patterning graph of rule 40 with  $L = 3$  in a linear topology with two organizer cells. In dark red a sample  
 672 path is shown leading from pattern '101' to the fixed point '001' using the instruction (rule 40, [1, 1]) – i.e., left and  
 673 right organizer cell have both state 1. The light red shaded areas show the attraction basins of the instruction (rule 40,  
 674 [1, 1]) with the attractors '000' and '001'. Using also the other possible instructions with rule 40 all configurations are  
 675 in the attraction basin of '000', while only the right shaded subset is in the attraction basin of '001'. Right: The  
 676 contributions of rule 40 with all possible inputs to the attractor graph are calculated by adding a directed edge towards a  
 677 node if the pattern corresponding to the origin of the arrow is in the attraction basin of the target node. The red arrow  
 678 corresponds to the red path on the left. The other contributions shown are from rule 86 depicted in Fig. 2. All  
 679 contributions from all rules generate the attractor graph. (b) Example for  $L = 10$ . The target pattern is reached with 5  
 680 instructions. After each instruction, the system is allowed to reach its steady state which may last as long as desired  
 681 (dots in timeline). (c) Number of reachable patterns as a function of  $L$  compared to the total number of patterns  $2^L$ .  
 682 The number of reachable patterns is determined by calculating how many nodes (patterns) of the attractor graph can be  
 683 reached on a directed path from the 0 pattern. (d) Average number of instructions necessary to generate reachable  
 684 patterns, with standard deviation as error bars, as a function of  $L$ , with a linear fit in the range  $L \in [8, 16]$  to exclude  
 685 finite size effects.
